# Supplementary material for: Systematic Review and Meta-Analysis on the Infection Rates of Schistosome Transmitting Snails in Southern Africa
Source: MDPI journal article supplement (doi:10.3390/tropicalmed7050072), 2022-05-13
Supplement: s1 [file s1]

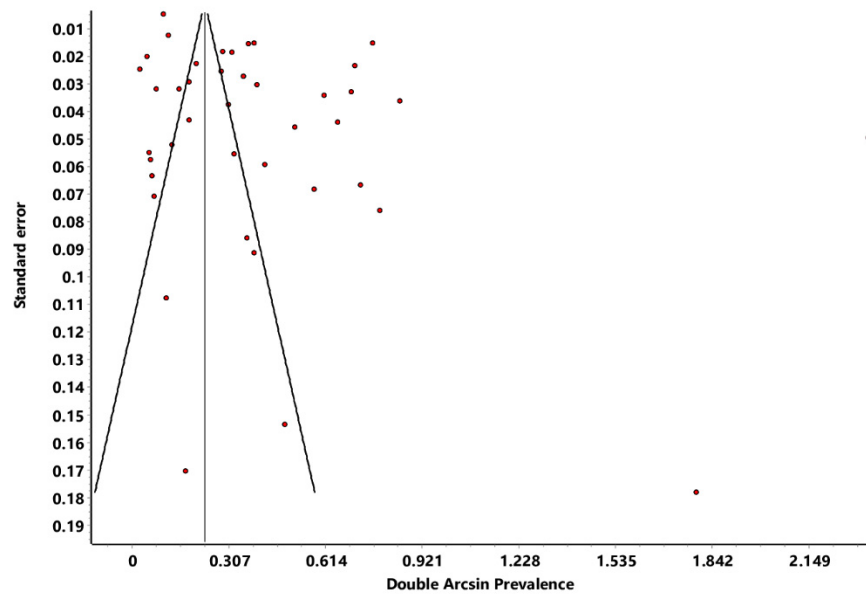

Figure S3: Funnel plot of the double arcsine prevalence estimates infection rates of Schistosome Transmitting Snails in Southern Africa.
