# Supplementary material for: Systematic Review and Meta-Analysis on the Infection Rates of Schistosome Transmitting Snails in Southern Africa
Source: MDPI journal article supplement (doi:10.3390/tropicalmed7050072), 2022-05-13
Supplement: s1 [file s1]

Search strategy used to identify selected articles with the search terms, Boolean operators, limits applied on each database and the date the databases were assessed.

### PubMed (12/11/2021)

39,((((((((((((Schistosome intermediate host) OR (Intermediate host snails)) OR (Snail intermediate host)) OR (Intermediate host)) OR (freshwater snails)) OR (freshwater snail host)) OR (snail vector)) OR (malacology survey)) OR (malacology survey)) OR (Biomphalaria)) OR (Bulinus)) OR (Bulinid)) AND (((((Infection) OR (Infection rate)) OR (Intensity)) OR (prevalence)) OR (incidence))) AND ((((((Schistosomiasis) OR (Bilharzia)) OR (Bilharziasis)) OR (Schistosoma mansoni)) OR (Schistosoma haematobium)) OR (Schistosoma))) AND (((((((((Angola) OR (Botswana)) OR (Lesotho)) OR (Mozambique)) OR (Namibia)) OR (South Africa)) OR (Swaziland)) OR (Eswatini)) OR (Zambia)) OR (Zimbabwe))),, ""((((("schistosoma"[MeSH Terms] OR "schistosoma"[All Fields] OR "schistosome"[All Fields] OR "schistosomes"[All Fields] OR "schistosomal"[All Fields]) AND ("intermediate"[All Fields] OR "intermediated"[All Fields] OR "intermediately"[All Fields] OR "intermediates"[All Fields]) AND "host"[All Fields]) OR ((("intermediate"[All Fields] OR "intermediated"[All Fields] OR "intermediately"[All Fields] OR "intermediates"[All Fields]) AND "host"[All Fields] AND ("snail s"[All Fields] OR "snails"[MeSH Terms] OR "snails"[All Fields] OR "snail"[All Fields])) OR ((("snail s"[All Fields] OR "snails"[MeSH Terms] OR "snails"[All Fields] OR "snail"[All Fields]) AND ("intermediate"[All Fields] OR "intermediated"[All Fields] OR "intermediately"[All Fields] OR "intermediates"[All Fields]) AND "host"[All Fields]) OR ((("intermediate"[All Fields] OR "intermediated"[All Fields] OR "intermediately"[All Fields] OR "intermediates"[All Fields]) AND "host"[All Fields]) OR ((("fresh water"[MeSH Terms] OR ("fresh"[All Fields] AND "water"[All Fields]) OR "fresh water"[All Fields] OR "freshwater"[All Fields] OR "freshwaters"[All Fields]) AND ("snail s"[All Fields] OR "snails"[MeSH Terms] OR "snails"[All Fields] OR "snail"[All Fields])) OR ((("fresh water"[MeSH Terms] OR ("fresh"[All Fields] AND "water"[All Fields]) OR "fresh water"[All Fields] OR "freshwater"[All Fields] OR "freshwaters"[All Fields]) AND ("snail s"[All Fields] OR "snails"[MeSH Terms] OR "snails"[All Fields] OR "snail"[All Fields]) AND "host"[All Fields]) OR ((("snail s"[All Fields] OR "snails"[MeSH Terms] OR "snails"[All Fields] OR "snail"[All Fields]) AND ("genetic vectors"[MeSH Terms] OR ("genetic"[All Fields] AND "vectors"[All Fields]) OR "genetic vectors"[All Fields] OR "vector"[All Fields] OR "disease vectors"[MeSH Terms] OR ("disease"[All Fields] AND "vectors"[All Fields]) OR "disease vectors"[All Fields] OR "vectors"[All Fields] OR "vector s"[All Fields] OR "vectored"[All Fields] OR "vectoring"[All Fields] OR "vectorization"[All Fields] OR "vectorize"[All Fields] OR "vectorized"[All Fields] OR "vectorizing"[All Fields])) OR ("malacology"[All Fields] AND ("survey s"[All Fields] OR "surveyed"[All Fields] OR "surveying"[All Fields] OR "surveys and questionnaires"[MeSH Terms] OR ("surveys"[All Fields] AND

""questionnaires""[All Fields]) OR ""surveys and questionnaires""[All Fields] OR  
 ""survey""[All Fields] OR ""surveys""[All Fields])) OR (""malacology""[All  
 Fields] AND (""survey s""[All Fields] OR ""surveyed""[All Fields] OR  
 ""surveying""[All Fields] OR ""surveys and questionnaires""[MeSH Terms] OR  
 (""surveys""[All Fields] AND ""questionnaires""[All Fields]) OR ""surveys and  
 questionnaires""[All Fields] OR ""survey""[All Fields] OR ""surveys""[All  
 Fields])) OR (""biomphalaria""[MeSH Terms] OR ""biomphalaria""[All Fields]) OR  
 (""bulinus""[MeSH Terms] OR ""bulinus""[All Fields]) OR ""Bulinid""[All  
 Fields]) AND (""infect""[All Fields] OR ""infectability""[All Fields] OR  
 ""infectable""[All Fields] OR ""infectant""[All Fields] OR ""infectants""[All  
 Fields] OR ""infected""[All Fields] OR ""infecteds""[All Fields] OR  
 ""infectibility""[All Fields] OR ""infectible""[All Fields] OR ""infecting""[All  
 Fields] OR ""infection s""[All Fields] OR ""infections""[MeSH Terms] OR  
 ""infections""[All Fields] OR ""infection""[All Fields] OR ""infective""[All  
 Fields] OR ""infectiveness""[All Fields] OR ""infectives""[All Fields] OR  
 ""infectivities""[All Fields] OR ""infects""[All Fields] OR  
 ""pathogenicity""[MeSH Subheading] OR ""pathogenicity""[All Fields] OR  
 ""infectivity""[All Fields] OR ((""infect""[All Fields] OR ""infectability""[All  
 Fields] OR ""infectable""[All Fields] OR ""infectant""[All Fields] OR  
 ""infectants""[All Fields] OR ""infected""[All Fields] OR ""infecteds""[All  
 Fields] OR ""infectibility""[All Fields] OR ""infectible""[All Fields] OR  
 ""infecting""[All Fields] OR ""infection s""[All Fields] OR ""infections""[MeSH  
 Terms] OR ""infections""[All Fields] OR ""infection""[All Fields] OR  
 ""infective""[All Fields] OR ""infectiveness""[All Fields] OR ""infectives""[All  
 Fields] OR ""infectivities""[All Fields] OR ""infects""[All Fields] OR  
 ""pathogenicity""[MeSH Subheading] OR ""pathogenicity""[All Fields] OR  
 ""infectivity""[All Fields]) AND (""rehabil assist technol eng""[Journal] OR  
 ""rate""[All Fields])) OR (""intense""[All Fields] OR ""intensely""[All Fields]  
 OR ""intensities""[All Fields] OR ""intensity""[All Fields] OR  
 ""intensively""[All Fields]) OR (""epidemiology""[MeSH Subheading] OR  
 ""epidemiology""[All Fields] OR ""prevalence""[All Fields] OR  
 ""prevalence""[MeSH Terms] OR ""prevalance""[All Fields] OR  
 ""prevalences""[All Fields] OR ""prevalence s""[All Fields] OR  
 ""prevalent""[All Fields] OR ""prevalently""[All Fields] OR ""prevalents""[All  
 Fields]) OR (""epidemiology""[MeSH Subheading] OR ""epidemiology""[All  
 Fields] OR ""incidence""[All Fields] OR ""incidence""[MeSH Terms] OR  
 ""incidences""[All Fields] OR ""incident""[All Fields] OR ""incidents""[All  
 Fields])) AND (""schistosomiasis""[MeSH Terms] OR ""schistosomiasis""[All  
 Fields] OR ""schistosomiasis""[All Fields] OR (""schistosomiasis""[MeSH Terms]  
 OR ""schistosomiasis""[All Fields] OR ""bilharzia""[All Fields] OR  
 ""schistosoma""[MeSH Terms] OR ""schistosoma""[All Fields]) OR  
 (""schistosomiasis""[MeSH Terms] OR ""schistosomiasis""[All Fields] OR  
 ""bilharziasis""[All Fields]) OR (""schistosoma mansonii""[MeSH Terms] OR  
 (""schistosoma""[All Fields] AND ""mansonii""[All Fields]) OR ""schistosoma  
 mansonii""[All Fields]) OR (""schistosoma haematobium""[MeSH Terms] OR  
 (""schistosoma""[All Fields] AND ""haematobium""[All Fields]) OR

""schistosoma haematobium""[All Fields]) OR (""schistosoma""[MeSH Terms] OR ""schistosoma""[All Fields] OR ""schistosomas""[All Fields])) AND (""angola""[MeSH Terms] OR ""angola""[All Fields] OR ""angola s""[All Fields] OR (""botswana""[MeSH Terms] OR ""botswana""[All Fields] OR ""botswana s""[All Fields]) OR (""lesotho""[MeSH Terms] OR ""lesotho""[All Fields]) OR (""mozambique""[MeSH Terms] OR ""mozambique""[All Fields] OR ""mozambique s""[All Fields]) OR (""namibia""[MeSH Terms] OR ""namibia""[All Fields]) OR (""south africa""[MeSH Terms] OR (""south""[All Fields] AND ""africa""[All Fields]) OR ""south africa""[All Fields]) OR (""eswatini""[MeSH Terms] OR ""eswatini""[All Fields] OR ""swaziland""[All Fields]) OR (""eswatini""[MeSH Terms] OR ""eswatini""[All Fields]) OR (""zambia""[MeSH Terms] OR ""zambia""[All Fields] OR ""zambia s""[All Fields]) OR (""zimbabwe""[MeSH Terms] OR ""zimbabwe""[All Fields] OR ""zimbabwe s""[All Fields]))"" ,178,15:39:34"

"38,((((((((Angola) OR (Botswana)) OR (Lesotho)) OR (Mozambique)) OR (Namibia)) OR (South Africa)) OR (Swaziland)) OR (Eswatini)) OR (Zambia)) OR (Zimbabwe),, ""angola""[MeSH Terms] OR ""angola""[All Fields] OR ""angola s""[All Fields] OR (""botswana""[MeSH Terms] OR ""botswana""[All Fields] OR ""botswana s""[All Fields]) OR (""lesotho""[MeSH Terms] OR ""lesotho""[All Fields]) OR (""mozambique""[MeSH Terms] OR ""mozambique""[All Fields] OR ""mozambique s""[All Fields]) OR (""namibia""[MeSH Terms] OR ""namibia""[All Fields]) OR (""south africa""[MeSH Terms] OR (""south""[All Fields] AND ""africa""[All Fields]) OR ""south africa""[All Fields]) OR (""eswatini""[MeSH Terms] OR ""eswatini""[All Fields] OR ""swaziland""[All Fields]) OR (""eswatini""[MeSH Terms] OR ""eswatini""[All Fields]) OR (""zambia""[MeSH Terms] OR ""zambia""[All Fields] OR ""zambia s""[All Fields]) OR (""zimbabwe""[MeSH Terms] OR ""zimbabwe""[All Fields] OR ""zimbabwe s""[All Fields])"" ,""174,704"" ,15:18:24"

"37,Zimbabwe,, ""zimbabwe""[MeSH Terms] OR ""zimbabwe""[All Fields] OR ""zimbabwe s""[All Fields]"" ,""10,429"" ,15:16:13"

"36,Zambia,, ""zambia""[MeSH Terms] OR ""zambia""[All Fields] OR ""zambia s""[All Fields]"" ,""8,430"" ,15:16:03"

"35,Eswatini,, ""eswatini""[MeSH Terms] OR ""eswatini""[All Fields]"" ,803,15:15:51"

"34,Swaziland,, ""eswatini""[MeSH Terms] OR ""eswatini""[All Fields] OR ""swaziland""[All Fields]"" ,""1,314"" ,15:15:41"

"33,South Africa,, ""south africa""[MeSH Terms] OR (""south""[All Fields] AND ""africa""[All Fields]) OR ""south africa""[All Fields]"" ,""150,243"" ,15:15:28"

"32,Namibia,, ""namibia""[MeSH Terms] OR ""namibia""[All Fields]"" ,""2,654"" ,15:15:21"

"31,Mozambique,, ""mozambique""[MeSH Terms] OR ""mozambique""[All Fields] OR ""mozambique s""[All Fields]"" ,""5,336"" ,15:15:10"

"30,Lesotho,,,"lesotho"[MeSH Terms] OR "lesotho"[All Fields]"",931,15:14:57"

"29,Botswana,,,"botswana"[MeSH Terms] OR "botswana"[All Fields] OR "botswana s"[All Fields]"",4,078,15:14:51"

"28,Angola,,,"angola"[MeSH Terms] OR "angola"[All Fields] OR "angola s"[All Fields]"",2,012,15:14:30"

"27,((((((((((((Schistosome intermediate host) OR (Intermediate host snails)) OR (Snail intermediate host)) OR (Intermediate host)) OR (freshwater snails)) OR (freshwater snail host)) OR (snail vector)) OR (malacology survey)) OR (malacology survey)) OR (Biomphalaria)) OR (Bulinus)) OR (Bulinid)) AND (((((Infection) OR (Infection rate)) OR (Intensity)) OR (prevalence)) OR (incidence))) AND (((((Schistosomiasis) OR (Bilharzia)) OR (Bilharziasis)) OR (Schistosoma mansoni)) OR (Schistosoma haematobium)) OR (Schistosoma)),,"(((("schistosoma"[MeSH Terms] OR "schistosoma"[All Fields] OR "schistosome"[All Fields] OR "schistosomes"[All Fields] OR "schistosomal"[All Fields]) AND ("intermediate"[All Fields] OR "intermediated"[All Fields] OR "intermediately"[All Fields] OR "intermediates"[All Fields]) AND "host"[All Fields]) OR ((("intermediate"[All Fields] OR "intermediated"[All Fields] OR "intermediately"[All Fields] OR "intermediates"[All Fields]) AND "host"[All Fields] AND ("snail s"[All Fields] OR "snails"[MeSH Terms] OR "snails"[All Fields] OR "snail"[All Fields])) OR ((("snail s"[All Fields] OR "snails"[MeSH Terms] OR "snails"[All Fields] OR "snail"[All Fields]) AND ("intermediate"[All Fields] OR "intermediated"[All Fields] OR "intermediately"[All Fields] OR "intermediates"[All Fields]) AND "host"[All Fields]) OR ((("intermediate"[All Fields] OR "intermediated"[All Fields] OR "intermediately"[All Fields] OR "intermediates"[All Fields]) AND "host"[All Fields]) OR ((("fresh water"[MeSH Terms] OR ("fresh"[All Fields] AND "water"[All Fields]) OR "fresh water"[All Fields] OR "freshwater"[All Fields] OR "freshwaters"[All Fields]) AND ("snail s"[All Fields] OR "snails"[MeSH Terms] OR "snails"[All Fields] OR "snail"[All Fields])) OR ((("fresh water"[MeSH Terms] OR ("fresh"[All Fields] AND "water"[All Fields]) OR "fresh water"[All Fields] OR "freshwater"[All Fields] OR "freshwaters"[All Fields]) AND ("snail s"[All Fields] OR "snails"[MeSH Terms] OR "snails"[All Fields] OR "snail"[All Fields]) AND "host"[All Fields]) OR ((("snail s"[All Fields] OR "snails"[MeSH Terms] OR "snails"[All Fields] OR "snail"[All Fields]) AND ("genetic vectors"[MeSH Terms] OR ("genetic"[All Fields] AND "vectors"[All Fields]) OR "genetic vectors"[All Fields] OR "vector"[All Fields] OR "disease vectors"[MeSH Terms] OR ("disease"[All Fields] AND "vectors"[All Fields]) OR "disease vectors"[All Fields] OR "vectors"[All Fields] OR "vector s"[All Fields] OR "vectored"[All Fields] OR "vectoring"[All Fields] OR "vectorization"[All Fields] OR "vectorize"[All Fields] OR "vectorized"[All Fields] OR "vectorizing"[All Fields])) OR ("malacology"[All Fields] AND ("survey s"[All Fields] OR "surveyed"[All Fields] OR "surveying"[All Fields] OR

"surveys and questionnaires"[MeSH Terms] OR ("surveys"[All Fields] AND  
 "questionnaires"[All Fields]) OR "surveys and questionnaires"[All Fields] OR  
 "survey"[All Fields] OR "surveys"[All Fields]) OR ("malacology"[All  
 Fields] AND ("survey s"[All Fields] OR "surveyed"[All Fields] OR  
 "surveying"[All Fields] OR "surveys and questionnaires"[MeSH Terms] OR  
 ("surveys"[All Fields] AND "questionnaires"[All Fields]) OR "surveys and  
 questionnaires"[All Fields] OR "survey"[All Fields] OR "surveys"[All  
 Fields])) OR ("biomphalaria"[MeSH Terms] OR "biomphalaria"[All Fields]) OR  
 ("bulinus"[MeSH Terms] OR "bulinus"[All Fields]) OR "Bulinid"[All  
 Fields]) AND ("infect"[All Fields] OR "infectability"[All Fields] OR  
 "infectable"[All Fields] OR "infectant"[All Fields] OR "infectants"[All  
 Fields] OR "infected"[All Fields] OR "infecteds"[All Fields] OR  
 "infectibility"[All Fields] OR "infectible"[All Fields] OR "infecting"[All  
 Fields] OR "infection s"[All Fields] OR "infections"[MeSH Terms] OR  
 "infections"[All Fields] OR "infection"[All Fields] OR "infective"[All  
 Fields] OR "infectiveness"[All Fields] OR "infectives"[All Fields] OR  
 "infectivities"[All Fields] OR "infects"[All Fields] OR  
 "pathogenicity"[MeSH Subheading] OR "pathogenicity"[All Fields] OR  
 "infectivity"[All Fields] OR (("infect"[All Fields] OR "infectability"[All  
 Fields] OR "infectable"[All Fields] OR "infectant"[All Fields] OR  
 "infectants"[All Fields] OR "infected"[All Fields] OR "infecteds"[All  
 Fields] OR "infectibility"[All Fields] OR "infectible"[All Fields] OR  
 "infecting"[All Fields] OR "infection s"[All Fields] OR "infections"[MeSH  
 Terms] OR "infections"[All Fields] OR "infection"[All Fields] OR  
 "infective"[All Fields] OR "infectiveness"[All Fields] OR "infectives"[All  
 Fields] OR "infectivities"[All Fields] OR "infects"[All Fields] OR  
 "pathogenicity"[MeSH Subheading] OR "pathogenicity"[All Fields] OR  
 "infectivity"[All Fields]) AND ("j rehabil assist technol eng"[Journal] OR  
 "rate"[All Fields])) OR ("intense"[All Fields] OR "intensely"[All Fields]  
 OR "intensities"[All Fields] OR "intensity"[All Fields] OR  
 "intensively"[All Fields]) OR ("epidemiology"[MeSH Subheading] OR  
 "epidemiology"[All Fields] OR "prevalence"[All Fields] OR  
 "prevalence"[MeSH Terms] OR "prevalance"[All Fields] OR  
 "prevalences"[All Fields] OR "prevalence s"[All Fields] OR  
 "prevalent"[All Fields] OR "prevalently"[All Fields] OR "prevalents"[All  
 Fields]) OR ("epidemiology"[MeSH Subheading] OR "epidemiology"[All  
 Fields] OR "incidence"[All Fields] OR "incidence"[MeSH Terms] OR  
 "incidences"[All Fields] OR "incident"[All Fields] OR "incidents"[All  
 Fields])) AND ("schistosomiasis"[MeSH Terms] OR "schistosomiasis"[All  
 Fields] OR "schistosomiasis"[All Fields] OR ("schistosomiasis"[MeSH Terms]  
 OR "schistosomiasis"[All Fields] OR "bilharzia"[All Fields] OR  
 "schistosoma"[MeSH Terms] OR "schistosoma"[All Fields]) OR  
 ("schistosomiasis"[MeSH Terms] OR "schistosomiasis"[All Fields] OR  
 "bilharziasis"[All Fields]) OR ("schistosoma mansoni"[MeSH Terms] OR  
 "schistosoma"[All Fields] AND "mansoni"[All Fields]) OR "schistosoma  
 mansoni"[All Fields] OR ("schistosoma haematobium"[MeSH Terms] OR

("""schistosoma""""[All Fields] AND """"haematobium""""[All Fields]) OR  
""""schistosoma haematobium""""[All Fields]) OR (""""schistosoma""""[MeSH Terms] OR  
""""schistosoma""""[All Fields] OR """"schistosomas""""[All  
Fields]))""", ""3,213""", 11:23:43"

"26,((((Schistosomiasis) OR (Bilharzia)) OR (Bilharziasis)) OR (Schistosoma mansoni)) OR  
(Schistosoma haematobium)) OR (Schistosoma),,, """"schistosomiasis""""[MeSH Terms]  
OR """"schistosomiasis""""[All Fields] OR """"schistosomiasis""""[All Fields] OR  
(""""schistosomiasis""""[MeSH Terms] OR """"schistosomiasis""""[All Fields] OR  
""""bilharzia""""[All Fields] OR """"schistosoma""""[MeSH Terms] OR  
""""schistosoma""""[All Fields]) OR (""""schistosomiasis""""[MeSH Terms] OR  
""""schistosomiasis""""[All Fields] OR """"bilharziasis""""[All Fields]) OR (""""schistosoma  
mansoni""""[MeSH Terms] OR (""""schistosoma""""[All Fields] AND """"mansoni""""[All  
Fields]) OR """"schistosoma mansoni""""[All Fields]) OR (""""schistosoma  
haematobium""""[MeSH Terms] OR (""""schistosoma""""[All Fields] AND  
""""haematobium""""[All Fields]) OR """"schistosoma haematobium""""[All Fields]) OR  
(""""schistosoma""""[MeSH Terms] OR """"schistosoma""""[All Fields] OR  
""""schistosomas""""[All Fields]))""", ""35,447""", 11:23:22"

"25,Schistosoma,, """"schistosoma""""[MeSH Terms] OR """"schistosoma""""[All Fields]  
OR """"schistosomas""""[All Fields])""", ""23,365""", 11:18:59"

"24,Schistosoma haematobium,, """"schistosoma haematobium""""[MeSH Terms] OR  
(""""schistosoma""""[All Fields] AND """"haematobium""""[All Fields]) OR  
""""schistosoma haematobium""""[All Fields])""", ""3,968""", 11:18:35"

"23,Schistosoma mansoni,, """"schistosoma mansoni""""[MeSH Terms] OR  
(""""schistosoma""""[All Fields] AND """"mansoni""""[All Fields]) OR """"schistosoma  
mansoni""""[All Fields])""", ""14,546""", 11:18:15"

"22,Bilharziasis,, """"schistosomiasis""""[MeSH Terms] OR """"schistosomiasis""""[All  
Fields] OR """"bilharziasis""""[All Fields])""", ""28,400""", 11:17:59"

"21,Bilharzia,, """"schistosomiasis""""[MeSH Terms] OR """"schistosomiasis""""[All  
Fields] OR """"bilharzia""""[All Fields] OR """"schistosoma""""[MeSH Terms] OR  
""""schistosoma""""[All Fields])""", ""35,248""", 11:17:42"

"20,Schistosomiasis,, """"schistosomiasis""""[MeSH Terms] OR  
""""schistosomiasis""""[All Fields] OR """"schistosomiasis""""[All  
Fields])""", ""28,197""", 11:17:26"

"19,((((((((Schistosome intermediate host) OR (Intermediate host snails)) OR (Snail  
intermediate host)) OR (Intermediate host)) OR (freshwater snails)) OR (freshwater snail  
host)) OR (snail vector)) OR (malacology survey)) OR (malacology survey)) OR  
(Biomphalaria)) OR (Bulinus)) OR (Bulinid)) AND (((Infection) OR (Infection rate)) OR  
(Intensity)) OR (prevalence)) OR (incidence)), ""((""""schistosoma""""[MeSH Terms] OR  
""""schistosoma""""[All Fields] OR """"schistosome""""[All Fields] OR  
""""schistosomes""""[All Fields] OR """"schistosoma""""[All Fields]) AND  
(""""intermediate""""[All Fields] OR """"intermediated""""[All Fields] OR  
""""intermediately""""[All Fields] OR """"intermediates""""[All Fields]) AND

""host""[All Fields]) OR ((""intermediate""[All Fields] OR  
 ""intermediated""[All Fields] OR ""intermediately""[All Fields] OR  
 ""intermediates""[All Fields]) AND ""host""[All Fields] AND (""snail s""[All  
 Fields] OR ""snails""[MeSH Terms] OR ""snails""[All Fields] OR ""snail""[All  
 Fields])) OR ((""snail s""[All Fields] OR ""snails""[MeSH Terms] OR  
 ""snails""[All Fields] OR ""snail""[All Fields]) AND (""intermediate""[All  
 Fields] OR ""intermediated""[All Fields] OR ""intermediately""[All Fields] OR  
 ""intermediates""[All Fields]) AND ""host""[All Fields]) OR  
 ((""intermediate""[All Fields] OR ""intermediated""[All Fields] OR  
 ""intermediately""[All Fields] OR ""intermediates""[All Fields]) AND  
 ""host""[All Fields]) OR ((""fresh water""[MeSH Terms] OR (""fresh""[All  
 Fields] AND ""water""[All Fields]) OR ""fresh water""[All Fields] OR  
 ""freshwater""[All Fields] OR ""freshwaters""[All Fields]) AND (""snail s""[All  
 Fields] OR ""snails""[MeSH Terms] OR ""snails""[All Fields] OR ""snail""[All  
 Fields])) OR ((""fresh water""[MeSH Terms] OR (""fresh""[All Fields] AND  
 ""water""[All Fields]) OR ""fresh water""[All Fields] OR ""freshwater""[All  
 Fields] OR ""freshwaters""[All Fields]) AND (""snail s""[All Fields] OR  
 ""snails""[MeSH Terms] OR ""snails""[All Fields] OR ""snail""[All Fields])  
 AND ""host""[All Fields]) OR ((""snail s""[All Fields] OR ""snails""[MeSH  
 Terms] OR ""snails""[All Fields] OR ""snail""[All Fields]) AND (""genetic  
 vectors""[MeSH Terms] OR (""genetic""[All Fields] AND ""vectors""[All Fields])  
 OR ""genetic vectors""[All Fields] OR ""vector""[All Fields] OR ""disease  
 vectors""[MeSH Terms] OR (""disease""[All Fields] AND ""vectors""[All Fields])  
 OR ""disease vectors""[All Fields] OR ""vectors""[All Fields] OR ""vector  
 s""[All Fields] OR ""vectored""[All Fields] OR ""vectoring""[All Fields] OR  
 ""vectorization""[All Fields] OR ""vectorize""[All Fields] OR ""vectorized""[All  
 Fields] OR ""vectorizing""[All Fields])) OR (""malacology""[All Fields] AND  
 (""survey s""[All Fields] OR ""surveyed""[All Fields] OR ""surveying""[All  
 Fields] OR ""surveys and questionnaires""[MeSH Terms] OR (""surveys""[All  
 Fields] AND ""questionnaires""[All Fields]) OR ""surveys and questionnaires""[All  
 Fields] OR ""survey""[All Fields] OR ""surveys""[All Fields])) OR  
 (""malacology""[All Fields] AND (""survey s""[All Fields] OR ""surveyed""[All  
 Fields] OR ""surveying""[All Fields] OR ""surveys and questionnaires""[MeSH  
 Terms] OR (""surveys""[All Fields] AND ""questionnaires""[All Fields]) OR  
 ""surveys and questionnaires""[All Fields] OR ""survey""[All Fields] OR  
 ""surveys""[All Fields])) OR (""biomphalaria""[MeSH Terms] OR  
 ""biomphalaria""[All Fields]) OR (""bulinus""[MeSH Terms] OR  
 ""bulinus""[All Fields]) OR ""Bulinid""[All Fields] AND (""infect""[All Fields]  
 OR ""infectability""[All Fields] OR ""infectable""[All Fields] OR  
 ""infectant""[All Fields] OR ""infectants""[All Fields] OR ""infected""[All  
 Fields] OR ""infecteds""[All Fields] OR ""infectibility""[All Fields] OR  
 ""infectible""[All Fields] OR ""infecting""[All Fields] OR ""infection s""[All  
 Fields] OR ""infections""[MeSH Terms] OR ""infections""[All Fields] OR  
 ""infection""[All Fields] OR ""infective""[All Fields] OR ""infectiveness""[All  
 Fields] OR ""infectives""[All Fields] OR ""infectivities""[All Fields] OR  
 ""infects""[All Fields] OR ""pathogenicity""[MeSH Subheading] OR

""pathogenicity""[All Fields] OR ""infectivity""[All Fields] OR ((""infect""[All  
 Fields] OR ""infectability""[All Fields] OR ""infectable""[All Fields] OR  
 ""infectant""[All Fields] OR ""infectants""[All Fields] OR ""infected""[All  
 Fields] OR ""infecteds""[All Fields] OR ""infectibility""[All Fields] OR  
 ""infectible""[All Fields] OR ""infecting""[All Fields] OR ""infection s""[All  
 Fields] OR ""infections""[MeSH Terms] OR ""infections""[All Fields] OR  
 ""infection""[All Fields] OR ""infective""[All Fields] OR ""infectiveness""[All  
 Fields] OR ""infectives""[All Fields] OR ""infectivities""[All Fields] OR  
 ""infects""[All Fields] OR ""pathogenicity""[MeSH Subheading] OR  
 ""pathogenicity""[All Fields] OR ""infectivity""[All Fields]) AND (""j rehabil  
 assist technol eng""[Journal] OR ""rate""[All Fields]) OR (""intense""[All Fields]  
 OR ""intensely""[All Fields] OR ""intensities""[All Fields] OR ""intensity""[All  
 Fields] OR ""intensively""[All Fields]) OR (""epidemiology""[MeSH Subheading]  
 OR ""epidemiology""[All Fields] OR ""prevalence""[All Fields] OR  
 ""prevalence""[MeSH Terms] OR ""prevalance""[All Fields] OR  
 ""prevalences""[All Fields] OR ""prevalence s""[All Fields] OR  
 ""prevalent""[All Fields] OR ""prevalently""[All Fields] OR ""prevalents""[All  
 Fields]) OR (""epidemiology""[MeSH Subheading] OR ""epidemiology""[All  
 Fields] OR ""incidence""[All Fields] OR ""incidence""[MeSH Terms] OR  
 ""incidences""[All Fields] OR ""incident""[All Fields] OR ""incidents""[All  
 Fields]))""",11,056""",11:16:25"

"18,((((Infection) OR (Infection rate)) OR (Intensity)) OR (prevalence)) OR  
 (incidence),,, ""infect""[All Fields] OR ""infectability""[All Fields] OR  
 ""infectable""[All Fields] OR ""infectant""[All Fields] OR ""infectants""[All  
 Fields] OR ""infected""[All Fields] OR ""infecteds""[All Fields] OR  
 ""infectibility""[All Fields] OR ""infectible""[All Fields] OR ""infecting""[All  
 Fields] OR ""infection s""[All Fields] OR ""infections""[MeSH Terms] OR  
 ""infections""[All Fields] OR ""infection""[All Fields] OR ""infective""[All  
 Fields] OR ""infectiveness""[All Fields] OR ""infectives""[All Fields] OR  
 ""infectivities""[All Fields] OR ""infects""[All Fields] OR  
 ""pathogenicity""[MeSH Subheading] OR ""pathogenicity""[All Fields] OR  
 ""infectivity""[All Fields] OR ((""infect""[All Fields] OR ""infectability""[All  
 Fields] OR ""infectable""[All Fields] OR ""infectant""[All Fields] OR  
 ""infectants""[All Fields] OR ""infected""[All Fields] OR ""infecteds""[All  
 Fields] OR ""infectibility""[All Fields] OR ""infectible""[All Fields] OR  
 ""infecting""[All Fields] OR ""infection s""[All Fields] OR ""infections""[MeSH  
 Terms] OR ""infections""[All Fields] OR ""infection""[All Fields] OR  
 ""infective""[All Fields] OR ""infectiveness""[All Fields] OR ""infectives""[All  
 Fields] OR ""infectivities""[All Fields] OR ""infects""[All Fields] OR  
 ""pathogenicity""[MeSH Subheading] OR ""pathogenicity""[All Fields] OR  
 ""infectivity""[All Fields]) AND (""j rehabil assist technol eng""[Journal] OR  
 ""rate""[All Fields]) OR (""intense""[All Fields] OR ""intensely""[All Fields]  
 OR ""intensities""[All Fields] OR ""intensity""[All Fields] OR  
 ""intensively""[All Fields]) OR (""epidemiology""[MeSH Subheading] OR  
 ""epidemiology""[All Fields] OR ""prevalence""[All Fields] OR  
 ""prevalence""[MeSH Terms] OR ""prevalance""[All Fields] OR

""""prevalences""""[All Fields] OR """"prevalence s""""[All Fields] OR  
""""prevalent""""[All Fields] OR """"prevalently""""[All Fields] OR """"prevalents""""[All  
Fields]) OR (""""epidemiology""""[MeSH Subheading] OR """"epidemiology""""[All  
Fields] OR """"incidence""""[All Fields] OR """"incidence""""[MeSH Terms] OR  
""""incidences""""[All Fields] OR """"incident""""[All Fields] OR """"incidents""""[All  
Fields])""", ""6,825,276""", 11:16:03"

"17, incidence,, """"epidemiology""""[MeSH Subheading] OR """"epidemiology""""[All  
Fields] OR """"incidence""""[All Fields] OR """"incidence""""[MeSH Terms] OR  
""""incidences""""[All Fields] OR """"incident""""[All Fields] OR """"incidents""""[All  
Fields]""", ""3,234,667""", 11:15:24"

"16, prevalence,, """"epidemiology""""[MeSH Subheading] OR """"epidemiology""""[All  
Fields] OR """"prevalence""""[All Fields] OR """"prevalence""""[MeSH Terms] OR  
""""prevalance""""[All Fields] OR """"prevalences""""[All Fields] OR """"prevalence  
s""""[All Fields] OR """"prevalent""""[All Fields] OR """"prevalently""""[All Fields] OR  
""""prevalents""""[All Fields]""", ""3,103,946""", 11:15:11"

"15, Intensity,, """"intense""""[All Fields] OR """"intensely""""[All Fields] OR  
""""intensities""""[All Fields] OR """"intensity""""[All Fields] OR """"intensively""""[All  
Fields]""", ""559,177""", 11:14:51"

"14, Infection rate,, ""("""infect""""[All Fields] OR """"infectability""""[All Fields] OR  
""""infectable""""[All Fields] OR """"infectant""""[All Fields] OR """"infectants""""[All  
Fields] OR """"infected""""[All Fields] OR """"infecteds""""[All Fields] OR  
""""infectibility""""[All Fields] OR """"infectible""""[All Fields] OR """"infecting""""[All  
Fields] OR """"infection s""""[All Fields] OR """"infections""""[MeSH Terms] OR  
""""infections""""[All Fields] OR """"infection""""[All Fields] OR """"infective""""[All  
Fields] OR """"infectiveness""""[All Fields] OR """"infectives""""[All Fields] OR  
""""infectivities""""[All Fields] OR """"infects""""[All Fields] OR  
""""pathogenicity""""[MeSH Subheading] OR """"pathogenicity""""[All Fields] OR  
""""infectivity""""[All Fields]) AND (""""j rehabil assist technol eng""""[Journal] OR  
""""rate""""[All Fields])""", ""289,492""", 11:14:34"

"13, Infection,, """"infect""""[All Fields] OR """"infectability""""[All Fields] OR  
""""infectable""""[All Fields] OR """"infectant""""[All Fields] OR """"infectants""""[All  
Fields] OR """"infected""""[All Fields] OR """"infecteds""""[All Fields] OR  
""""infectibility""""[All Fields] OR """"infectible""""[All Fields] OR """"infecting""""[All  
Fields] OR """"infection s""""[All Fields] OR """"infections""""[MeSH Terms] OR  
""""infections""""[All Fields] OR """"infection""""[All Fields] OR """"infective""""[All  
Fields] OR """"infectiveness""""[All Fields] OR """"infectives""""[All Fields] OR  
""""infectivities""""[All Fields] OR """"infects""""[All Fields] OR  
""""pathogenicity""""[MeSH Subheading] OR """"pathogenicity""""[All Fields] OR  
""""infectivity""""[All Fields]""", ""3,649,597""", 11:14:28"

"12,((((((((Schistosome intermediate host) OR (Intermediate host snails)) OR (Snail  
intermediate host)) OR (Intermediate host)) OR (freshwater snails)) OR (freshwater snail  
host)) OR (snail vector)) OR (malacology survey)) OR (malacology survey)) OR  
(Biomphalaria)) OR (Bulinus)) OR (Bulinid),, ""("""schistosoma""""[MeSH Terms] OR

""schistosoma""[All Fields] OR ""schistosome""[All Fields] OR  
 ""schistosomes""[All Fields] OR ""schistosomal""[All Fields]) AND  
 (""intermediate""[All Fields] OR ""intermediated""[All Fields] OR  
 ""intermediately""[All Fields] OR ""intermediates""[All Fields]) AND  
 ""host""[All Fields]) OR ((""intermediate""[All Fields] OR  
 ""intermediated""[All Fields] OR ""intermediately""[All Fields] OR  
 ""intermediates""[All Fields]) AND ""host""[All Fields] AND (""snail s""[All  
 Fields] OR ""snails""[MeSH Terms] OR ""snails""[All Fields] OR ""snail""[All  
 Fields])) OR ((""snail s""[All Fields] OR ""snails""[MeSH Terms] OR  
 ""snails""[All Fields] OR ""snail""[All Fields]) AND (""intermediate""[All  
 Fields] OR ""intermediated""[All Fields] OR ""intermediately""[All Fields] OR  
 ""intermediates""[All Fields]) AND ""host""[All Fields]) OR  
 ((""intermediate""[All Fields] OR ""intermediated""[All Fields] OR  
 ""intermediately""[All Fields] OR ""intermediates""[All Fields]) AND  
 ""host""[All Fields]) OR ((""fresh water""[MeSH Terms] OR (""fresh""[All  
 Fields] AND ""water""[All Fields]) OR ""fresh water""[All Fields] OR  
 ""freshwater""[All Fields] OR ""freshwaters""[All Fields]) AND (""snail s""[All  
 Fields] OR ""snails""[MeSH Terms] OR ""snails""[All Fields] OR ""snail""[All  
 Fields])) OR ((""fresh water""[MeSH Terms] OR (""fresh""[All Fields] AND  
 ""water""[All Fields]) OR ""fresh water""[All Fields] OR ""freshwater""[All  
 Fields] OR ""freshwaters""[All Fields]) AND (""snail s""[All Fields] OR  
 ""snails""[MeSH Terms] OR ""snails""[All Fields] OR ""snail""[All Fields])  
 AND ""host""[All Fields]) OR ((""snail s""[All Fields] OR ""snails""[MeSH  
 Terms] OR ""snails""[All Fields] OR ""snail""[All Fields]) AND (""genetic  
 vectors""[MeSH Terms] OR (""genetic""[All Fields] AND ""vectors""[All Fields])  
 OR ""genetic vectors""[All Fields] OR ""vector""[All Fields] OR ""disease  
 vectors""[MeSH Terms] OR (""disease""[All Fields] AND ""vectors""[All Fields])  
 OR ""disease vectors""[All Fields] OR ""vectors""[All Fields] OR ""vector  
 s""[All Fields] OR ""vectored""[All Fields] OR ""vectoring""[All Fields] OR  
 ""vectorization""[All Fields] OR ""vectorize""[All Fields] OR ""vectorized""[All  
 Fields] OR ""vectorizing""[All Fields])) OR (""malacology""[All Fields] AND  
 (""survey s""[All Fields] OR ""surveyed""[All Fields] OR ""surveying""[All  
 Fields] OR ""surveys and questionnaires""[MeSH Terms] OR (""surveys""[All  
 Fields] AND ""questionnaires""[All Fields]) OR ""surveys and questionnaires""[All  
 Fields] OR ""survey""[All Fields] OR ""surveys""[All Fields])) OR  
 (""malacology""[All Fields] AND (""survey s""[All Fields] OR ""surveyed""[All  
 Fields] OR ""surveying""[All Fields] OR ""surveys and questionnaires""[MeSH  
 Terms] OR (""surveys""[All Fields] AND ""questionnaires""[All Fields]) OR  
 ""surveys and questionnaires""[All Fields] OR ""survey""[All Fields] OR  
 ""surveys""[All Fields])) OR (""biomphalaria""[MeSH Terms] OR  
 ""biomphalaria""[All Fields]) OR (""bulinus""[MeSH Terms] OR  
 ""bulinus""[All Fields]) OR ""Bulinid""[All Fields]""", "18,609", 11:12:05"

"11,Bulinid,, ""Bulinid""[All Fields]""", 31, 11:07:11"

"10,Bulinus,, ""bulinus""[MeSH Terms] OR ""bulinus""[All  
 Fields]""", 959, 11:06:51"

"9,Biomphalaria,,,"""biomphalaria""[MeSH Terms] OR ""biomphalaria""[All Fields]""",3,313",11:06:37"

"8,malacology survey,,,"""malacology""[All Fields] AND (""survey s""[All Fields] OR ""surveyed""[All Fields] OR ""surveying""[All Fields] OR ""surveys and questionnaires""[MeSH Terms] OR (""surveys""[All Fields] AND ""questionnaires""[All Fields]) OR ""surveys and questionnaires""[All Fields] OR ""survey""[All Fields] OR ""surveys""[All Fields])""",25,11:06:14"

"7,snail vector,,,"""snail s""[All Fields] OR ""snails""[MeSH Terms] OR ""snails""[All Fields] OR ""snail""[All Fields]) AND (""genetic vectors""[MeSH Terms] OR (""genetic""[All Fields] AND ""vectors""[All Fields]) OR ""genetic vectors""[All Fields] OR ""vector""[All Fields] OR ""disease vectors""[MeSH Terms] OR (""disease""[All Fields] AND ""vectors""[All Fields]) OR ""disease vectors""[All Fields] OR ""vectors""[All Fields] OR ""vector s""[All Fields] OR ""vectored""[All Fields] OR ""vectoring""[All Fields] OR ""vectorization""[All Fields] OR ""vectorize""[All Fields] OR ""vectorized""[All Fields] OR ""vectorizing""[All Fields])""",2,316",11:05:50"

"6,freshwater snail host,,,"""fresh water""[MeSH Terms] OR (""fresh""[All Fields] AND ""water""[All Fields]) OR ""fresh water""[All Fields] OR ""freshwater""[All Fields] OR ""freshwaters""[All Fields]) AND (""snail s""[All Fields] OR ""snails""[MeSH Terms] OR ""snails""[All Fields] OR ""snail""[All Fields]) AND ""host""[All Fields]""",738,11:05:32"

"5,freshwater snails,,,"""fresh water""[MeSH Terms] OR (""fresh""[All Fields] AND ""water""[All Fields]) OR ""fresh water""[All Fields] OR ""freshwater""[All Fields] OR ""freshwaters""[All Fields]) AND (""snail s""[All Fields] OR ""snails""[MeSH Terms] OR ""snails""[All Fields] OR ""snail""[All Fields])""",3,233",11:05:19"

"4,Intermediate host,,,"""intermediate""[All Fields] OR ""intermediated""[All Fields] OR ""intermediately""[All Fields] OR ""intermediates""[All Fields]) AND ""host""[All Fields]""",12,120",11:05:01"

"3,Snail intermediate host,,,"""snail s""[All Fields] OR ""snails""[MeSH Terms] OR ""snails""[All Fields] OR ""snail""[All Fields]) AND (""intermediate""[All Fields] OR ""intermediated""[All Fields] OR ""intermediately""[All Fields] OR ""intermediates""[All Fields]) AND ""host""[All Fields]""",2,021",11:04:45"

"2,Intermediate host snails,,,"""intermediate""[All Fields] OR ""intermediated""[All Fields] OR ""intermediately""[All Fields] OR ""intermediates""[All Fields]) AND ""host""[All Fields] AND (""snail s""[All Fields] OR ""snails""[MeSH Terms] OR ""snails""[All Fields] OR ""snail""[All Fields])""",2,021",11:04:18"

"1,Schistosoma intermediate host,,,"""schistosoma""[MeSH Terms] OR ""schistosoma""[All Fields] OR ""schistosome""[All Fields] OR ""schistosomes""[All Fields] OR ""schistosomal""[All Fields]) AND (""intermediate""[All Fields] OR ""intermediated""[All Fields] OR

""intermediately""[All Fields] OR ""intermediates""[All Fields]) AND  
""host""[All Fields]",""1,084","11:03:05"
