# Supplementary material for: Systematic Review and Meta-Analysis on the Infection Rates of Schistosome Transmitting Snails in Southern Africa
Source: MDPI journal article supplement (doi:10.3390/tropicalmed7050072), 2022-05-13
Supplement: s1 [file s1]

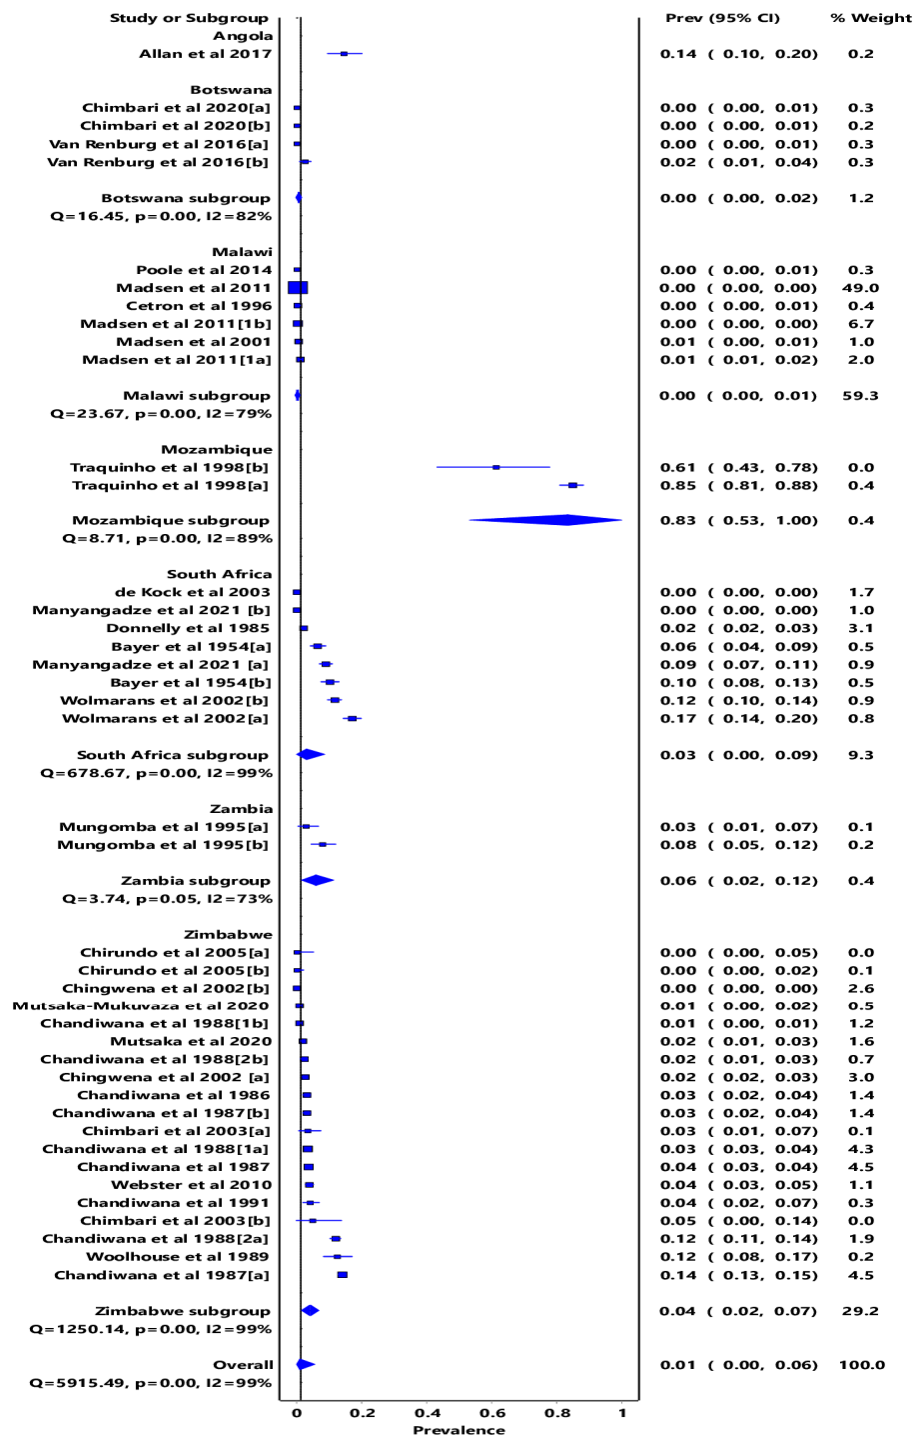

**Figure S1 Forest plot of subgrouped PPE by countries.** [a] and [b] represents *Bulinus spp* and *Biomphalaria spp* respectively when both species are of interest to the author(s). [1a] and [1b] represents *Bulinus spp* and *Biomphalaria spp* respectively when both species are of interest to the author(s) and is the first of two articles published in the same year by the same authors. [2a] and [2b] represents *Bulinus spp* and *Biomphalaria spp* respectively when both species are of interest to the author(s) and is the second article published in the same year.
