# Supplementary material for: Systematic Review and Meta-Analysis on the Infection Rates of Schistosome Transmitting Snails in Southern Africa
Source: MDPI journal article supplement (doi:10.3390/tropicalmed7050072), 2022-05-13
Supplement: s1 [file s1]

### **Quality assessment of the articles included.**

The Joanna Briggs Institute Critical Appraisal Tool for studies reporting prevalence data was used to assess the quality of all studies included in the review. The following questions were assessed using the tool assessed the about the articles:

- i. sample representative of the target population,
- ii. study participants recruited in an appropriate way,
- iii. sample size adequate
- iv. study subjects and setting described in detail
- v. data analysis conducted with sufficient coverage of the identified sample
- vi. objective standard criteria used for measurement of the condition
- vii. condition measured reliably,
- viii. appropriate statistical analysis,
- ix. important confounding factors/ subgroups/differences identified and accounted for,
- x. subpopulations identified using objective criteria.

| First Author and Year        | Was the sample representative of the target population? | Were study participants recruited in an appropriate way? | Was the sample size adequate? | Were the study subjects and setting described in detail? | Is the data analysis conducted with sufficient coverage of the identified sample? | Were objective, standard criteria used for measurement of the condition? | Was the condition measured reliably? | Was there appropriate statistical analysis? | Are all important confounding factors/subgroups/differences identified and accounted for? | Were subpopulations identified using objective criteria? | Quality score |
|------------------------------|---------------------------------------------------------|----------------------------------------------------------|-------------------------------|----------------------------------------------------------|-----------------------------------------------------------------------------------|--------------------------------------------------------------------------|--------------------------------------|---------------------------------------------|-------------------------------------------------------------------------------------------|----------------------------------------------------------|---------------|
| Allan et al. 2017            | Yes                                                     | Yes                                                      | Yes                           | Yes                                                      | Yes                                                                               | Yes                                                                      | Yes                                  | Yes                                         | No                                                                                        | Yes                                                      | 9             |
| Bayer et al. 1954            | Yes                                                     | Yes                                                      | Yes                           | Yes                                                      | Yes                                                                               | Yes                                                                      | Yes                                  | Yes                                         | No                                                                                        | Yes                                                      | 9             |
| Cetron et al. 1996           | Yes                                                     | Yes                                                      | Yes                           | Yes                                                      | Yes                                                                               | Yes                                                                      | Yes                                  | Yes                                         | No                                                                                        | Yes                                                      | 9             |
| Chandiwana et al. 1986       | Yes                                                     | Yes                                                      | Yes                           | Yes                                                      | Yes                                                                               | Yes                                                                      | Yes                                  | Yes                                         | No                                                                                        | Yes                                                      | 9             |
| Chandiwana et al. 1987       | Yes                                                     | Yes                                                      | Yes                           | Yes                                                      | Yes                                                                               | Yes                                                                      | Yes                                  | Yes                                         | Yes                                                                                       | Yes                                                      | 10            |
| Chandiwana et al. 1987 [a]   | Yes                                                     | Yes                                                      | Yes                           | Yes                                                      | Yes                                                                               | Yes                                                                      | Yes                                  | Yes                                         | Yes                                                                                       | Yes                                                      | 10            |
| Chandiwana et al. 1988       | Yes                                                     | Yes                                                      | Yes                           | Yes                                                      | Yes                                                                               | Yes                                                                      | Yes                                  | Yes                                         | No                                                                                        | Yes                                                      | 9             |
| Chandiwana et al. 1988 [2a]  | Yes                                                     | Yes                                                      | Yes                           | Yes                                                      | Yes                                                                               | Yes                                                                      | Yes                                  | Yes                                         | Yes                                                                                       | Yes                                                      | 10            |
| Chandiwana et al. 1991       | Yes                                                     | Yes                                                      | Yes                           | Yes                                                      | Yes                                                                               | Yes                                                                      | Yes                                  | Yes                                         | Yes                                                                                       | Yes                                                      | 10            |
| Chimbari et al. 2003         | Yes                                                     | Yes                                                      | Yes                           | Yes                                                      | Yes                                                                               | Yes                                                                      | Yes                                  | Yes                                         | No                                                                                        | Yes                                                      | 9             |
| Chimbari et al. 2020         | Yes                                                     | Yes                                                      | Yes                           | Yes                                                      | Yes                                                                               | Yes                                                                      | Yes                                  | Yes                                         | Yes                                                                                       | Yes                                                      | 10            |
| Chingwena et al. 2002        | Yes                                                     | Yes                                                      | Yes                           | Yes                                                      | Yes                                                                               | Yes                                                                      | Yes                                  | Yes                                         | No                                                                                        | Yes                                                      | 9             |
| Chirundo et al. 2005         | Yes                                                     | Yes                                                      | Yes                           | Yes                                                      | Yes                                                                               | Yes                                                                      | Yes                                  | Yes                                         | No                                                                                        | Yes                                                      | 9             |
| De KN Kock et al. 2003       | Yes                                                     | Yes                                                      | Yes                           | Yes                                                      | Yes                                                                               | Yes                                                                      | Yes                                  | Yes                                         | Yes                                                                                       | Yes                                                      | 10            |
| Donney et al. 1985           | Yes                                                     | Yes                                                      | Yes                           | Yes                                                      | Yes                                                                               | Yes                                                                      | Yes                                  | Yes                                         | Yes                                                                                       | Yes                                                      | 10            |
| Lukezo et al. 1995           | Yes                                                     | Yes                                                      | Yes                           | Yes                                                      | Yes                                                                               | Yes                                                                      | Yes                                  | Yes                                         | No                                                                                        | Yes                                                      | 9             |
| Madsen et al. 2001           | Yes                                                     | Yes                                                      | Yes                           | Yes                                                      | Yes                                                                               | Yes                                                                      | Yes                                  | Yes                                         | No                                                                                        | Yes                                                      | 9             |
| Madsen et al. 2011 (Density) | Yes                                                     | Yes                                                      | Yes                           | Yes                                                      | Yes                                                                               | Yes                                                                      | Yes                                  | Yes                                         | No                                                                                        | Yes                                                      | 9             |
| Madsen et al. 2011[a]        | Yes                                                     | Yes                                                      | Yes                           | Yes                                                      | Yes                                                                               | Yes                                                                      | Yes                                  | Yes                                         | No                                                                                        | Yes                                                      | 9             |
| Manyangadze et al. 2021      | Yes                                                     | Yes                                                      | Yes                           | Yes                                                      | Yes                                                                               | Yes                                                                      | Yes                                  | Yes                                         | Yes                                                                                       | Yes                                                      | 10            |
| Mutsaka et al. 2020          | Yes                                                     | Yes                                                      | Yes                           | Yes                                                      | Yes                                                                               | Yes                                                                      | Yes                                  | Yes                                         | No                                                                                        | Yes                                                      | 9             |
| Mutsaka-Mukuvaza et al. 2020 | Yes                                                     | Yes                                                      | Yes                           | Yes                                                      | Yes                                                                               | Yes                                                                      | Yes                                  | Yes                                         | No                                                                                        | Yes                                                      | 9             |
| Poole et al 2014             | Yes                                                     | Yes                                                      | Yes                           | Yes                                                      | Yes                                                                               | Yes                                                                      | Yes                                  | Yes                                         | No                                                                                        | Yes                                                      | 9             |

[illegible]
