# Supplementary material for: Systematic Review and Meta-Analysis on the Infection Rates of Schistosome Transmitting Snails in Southern Africa
Source: Trop Med Infect Dis. 2022 May 13;7(5):72. doi: 10.3390/tropicalmed7050072 (PMC9145527; doi:10.3390/tropicalmed7050072)
Supplement: Supplementary file 1 [file tropicalmed-07-00072-s001.zip]

Archive with 7 entries (7 files):
- Data.xlsx
- S1 Figure Forest plot of subgrouped PPE by countries.pdf
- S1 File Search strategy used to identify selected articles with the search terms.pdf
- S2 Figure Forest plot of subgrouped PPE by snail species.pdf
- S2 File Quality assessment.pdf
- S3 Figure Funnel Plot.pdf
- S4 Figure Doi plot.pdf
