# Supplementary material for: Systematic Review and Meta-Analysis on the Infection Rates of Schistosome Transmitting Snails in Southern Africa
Source: Trop Med Infect Dis. 2022 May 13;7(5):72. doi: 10.3390/tropicalmed7050072 (PMC9145527; doi:10.3390/tropicalmed7050072)
Supplement: Supplementary file 1 [file tropicalmed-07-00072-s001.zip › Data.xlsx]

## Sheet: Prev PS
Citation name	Sample size	Cases	Snail type	Country	Diagnostic technique	Study type												Bulinus spp	Biompalaria spp
Chimbari et al 2003[a]	120	4	B.globosus	Zimbabwe	Cercarial shedding	Longitudinal												Chimbari et al 2003[a]	Chimbari et al 2003[b]
Chimbari et al 2003[b]	42	2	B.pfeifferi	Zimbabwe	Cercarial shedding	Longitudinal												Chimbari et al 2020[a]	Chimbari et al 2020[b]
Chimbari et al 2020[a]	303	0	B.globosus	Botswana	Cercarial shedding	Longitudinal												Chandiwana et al 1988[1a]	Chandiwana et al 1988[1b]
Chimbari et al 2020[b]	199	0	B.pfeifferi	Botswana	Cercarial shedding	Longitudinal												Mutsaka-Mukuvaza et al 2020A	Chirundo et al 2005[b]
Chandiwana et al 1988[1a]	4237	142	B.globosus	Zimbabwe	Cercarial shedding	Longitudinal												Chirundo et al 2005[a]	Manyangadze et al 2021[b]
Chandiwana et al 1988[1b]	1163	9	B.pfeifferi	Zimbabwe	Cercarial shedding	Longitudinal												Allan et al 2017	Chandiwana et al 1986
Mutsaka et al 2020	1542	30	B.globosus	Zimbabwe	Cercarial shedding	Longitudinal												Manyangadze et al 2021[a]	Traquinho et al 1998[b]
Chirundo et al 2005[a]	34	0	B.globosus	Zimbabwe	Cercarial shedding	Cross-sectional												Woolhouse et al 1989	Bayer et al 1954[b]
Chirundo et al 2005[b]	86	0	B.pfeifferi	Zimbabwe	Cercarial shedding	Cross-sectional												Traquinho et al 1998[a]	Chingwena et al 2002 [b]
Allan et al 2017	173	25	B.globosus	Angola	Cercarial shedding	Cross-sectional												Bayer et al 1954[a]	KN de Kock et al 2003
Manyangadze et al 2021[a]	861	77	B.globosus	South Africa	Cercarial shedding	Longitudinal												Cetron et al 1996	Donnelly et al 1985
Manyangadze et al 2021[b]	985	1	B.pfeifferi	South Africa	Cercarial shedding	Longitudinal												Chingwena et al 2002 [a]	Van Renburg et al 2016[b]
Chandiwana et al 1986	1347	41	B.pfeifferi	Zimbabwe	Cercarial shedding	Longitudinal												Van Renburg et al 2016[a]	Webster et al 2010
Woolhouse et al 1989	225	28	B.globosus	Zimbabwe	Cercarial shedding	Longitudinal												Wolmarans et al 2002 [a]	Wolmarans et al 2002 [b]
Traquinho et al 1998[a]	407	345	Bulinus spp	Mozambique	Cercarial shedding	Cross-sectional												Madsen et al 2011 (Density)	Mutsaka-Mukuvaza et al 2020B
Traquinho et al 1998[b]	31	19	Biomphalaria spp	Mozambique	Cercarial shedding	Cross-sectional												Madsen et al 2011[a]	Madsen et al 2011[b]
Bayer et al 1954[a]	482	31	B.globosus	South Africa	Cercarial shedding	Longitudinal												Chandiwana et al 1987	Chandiwana et al 1988[2b]
Bayer et al 1954[b]	520	53	B.pfeifferi	South Africa	Cercarial shedding	Longitudinal												Chandiwana et al 1988[2a]	Chandiwana et al 1987[b]
Cetron et al 1996	370	1	B.globosus	Malawi	Cercarial shedding	Longitudinal												Chandiwana et al 1987[a]	Lukezo et al 1995[b]
Chingwena et al 2002 [a]	2934	73	B.globosus	Zimbabwe	Cercarial shedding	Longitudinal												Lukezo et al 1995[a]
Chingwena et al 2002 [b]	2535	1	B.pfeifferi	Zimbabwe	Cercarial shedding	Longitudinal
KN de Kock et al 2003	1639	0	B.pfeifferi	South Africa	Cercarial shedding	Cross-sectional
Donnelly et al 1985	3062	62	B.pfeifferi	South Africa	Cercarial shedding	Longitudinal
Van Renburg et al 2016[a]	333	0	B.globosus	Botswana	Cercarial shedding	Longitudinal
Van Renburg et al 2016[b]	325	8	B.pfeifferi	Botswana	Cercarial shedding	Longitudinal
Webster et al 2010	1099	42	B.pfeifferi	Zimbabwe	Cercarial shedding	Cross-sectional
Wolmarans et al 2002 [a]	767	130	B.globosus	South Africa	Cercarial shedding	Longitudinal
Wolmarans et al 2002 [b]	932	108	B.pfeifferi	South Africa	Cercarial shedding	Longitudinal
Mutsaka-Mukuvaza et al 2020	542	4	B.pfeifferi	Zimbabwe	Cercarial shedding	Longitudinal
Madsen et al 2011 (Density)	48632	122	B.nyassanus	Malawi	Cercarial shedding	Longitudinal
Madsen et al 2011[a]	1970	20	B.globosus	Malawi	Cercarial shedding	Longitudinal
Madsen et al 2011[b]	6664	22	B.nyassanus	Malawi	Cercarial shedding	Longitudinal
Chandiwana et al 1987	4452	164	B.globosus	Zimbabwe	Cercarial shedding	Longitudinal
Chandiwana et al 1988[2a]	1851	222	B.globosus	Zimbabwe	Cercarial shedding	Longitudinal
Chandiwana et al 1988[2b]	715	16	B.pfeifferi	Zimbabwe	Cercarial shedding	Longitudinal
Chandiwana et al 1987[a]	4452	617	B.globosus	Zimbabwe	Cercarial shedding	Longitudinal
Chandiwana et al 1987[b]	1347	41	B.pfeifferi	Zimbabwe	Cercarial shedding	Longitudinal
Chandiwana et al 1991	285	12	B.globosus	Zimbabwe	Cercarial shedding	Cross-sectional
Lukezo et al 1995[a]	135	4	B.globosus	Zambia	Cercarial shedding	Cross-sectional
Lukezo et al 1995[b]	215	17	B.pfeifferi	Zambia	Cercarial shedding	Cross-sectional
Madsen et al 2001	992	5	B.nyassanus	Malawi	Cercarial shedding	Cross-sectional
Poole et al 2014	250	0	B.globosus	Malawi	Cercarial shedding	Cross-sectional
